# Supplementary material
Source: Royal Society of Chemistry journal article supplement (doi:10.1039/d6ce00362a)
Supplement: d6ce00362a1.pdf [file d6ce00362a1.pdf]

# Icosahedral $\text{Na}_4@L_{12}@L_{20}$ Nanocages Nested by a $\{\text{Na}_4\}$ Parallelogram core and a $\{L_{20}\}$ Dodecahedral shell

Bei Hu,<sup>a,†</sup> Guo-Xu Li,<sup>a,†</sup> Li Zhu,<sup>\*b</sup> Hui-Hui Yu,<sup>a</sup> Yi-Cong Lou,<sup>a</sup> Shu-Ying Luo,<sup>\*a</sup> Fu-Pei Liang,<sup>a</sup> and  
Kai Wang<sup>\*a</sup>

<sup>a</sup>Guangxi Key Laboratory of Electrochemical and Magnetochemical Functional Materials, College of Chemistry  
and Bioengineering, Guilin University of Technology, Guilin, 541004, China.

<sup>b</sup>School of Chemistry and Materials Engineering, Xinxiang University, Xinxiang, 453003 P.R. China

Corresponding authors: [kaiwang@glut.edu.cn](mailto:kaiwang@glut.edu.cn); [zhuli510@xxu.edu.cn](mailto:zhuli510@xxu.edu.cn); [shuyingluo2016@163.com](mailto:shuyingluo2016@163.com)

<sup>†</sup>Bei Hu and Guo-Xu Li contributed equally to this work.

## TABLE OF CONTENTS

|                                                                                                                                                                                                     |    |
|-----------------------------------------------------------------------------------------------------------------------------------------------------------------------------------------------------|----|
| Experimental Section .....                                                                                                                                                                          | 3  |
| General Materials and Methods .....                                                                                                                                                                 | 3  |
| Synthesis of sodium <i>N, N'</i> -bis(oxoacetate)-(1 <i>R</i> , 2 <i>R</i> )-diaminocyclohexane (Na <sub>2</sub> L) .....                                                                           | 3  |
| Synthesis of Na <sub>4</sub> @Gd <sub>12</sub> @L <sub>20</sub> and Na <sub>4</sub> @Dy <sub>12</sub> @L <sub>20</sub> .....                                                                        | 4  |
| Single-crystal X-ray Crystallography .....                                                                                                                                                          | 4  |
| Reference.....                                                                                                                                                                                      | 5  |
| Supplementary Figures and Tables .....                                                                                                                                                              | 6  |
| <b>Fig. S1.</b> Coordination geometries of Ln1 and Ln6 ions (Ln = Gd, Dy). .....                                                                                                                    | 6  |
| <b>Table S1.</b> Calculated CShM parameters of Ln1 and Ln6 ions (Ln = Gd, Dy).....                                                                                                                  | 6  |
| <b>Fig. S2.</b> Coordination geometries of Ln2 and Ln5 ions (Ln = Gd, Dy). .....                                                                                                                    | 7  |
| <b>Table S2.</b> Calculated CShM parameters of Ln2 and Ln5 ions (Ln = Gd, Dy).....                                                                                                                  | 7  |
| <b>Fig. S3.</b> Coordination geometries of Ln3 and Ln4 ions (Ln = Gd, Dy). .....                                                                                                                    | 8  |
| <b>Table S3.</b> Calculated CShM parameters of Ln3 and Ln4 ions (Ln = Gd, Dy).....                                                                                                                  | 8  |
| <b>Fig. S4.</b> Coordination geometries of Na ions. ....                                                                                                                                            | 9  |
| <b>Table S4.</b> Calculated CShM parameters of Na ions.....                                                                                                                                         | 9  |
| <b>Table S5.</b> The distances between the adjacent Ln <sup>III</sup> ions in Na <sub>4</sub> @Gd <sub>12</sub> @L <sub>20</sub> and Na <sub>4</sub> @Dy <sub>12</sub> @L <sub>20</sub> . ....      | 10 |
| <b>Table S6.</b> The distances between Ln <sup>III</sup> ion and meaning center of Na <sub>4</sub> @Gd <sub>12</sub> @L <sub>20</sub> and Na <sub>4</sub> @Dy <sub>12</sub> @L <sub>20</sub> . .... | 10 |
| <b>Fig. S5.</b> Five ligands and five adjacent Gd ions linked with each Gd ion.....                                                                                                                 | 11 |
| <b>Fig. S6.</b> The linkage between {Na <sub>2</sub> } unit and inner wall of {Gd <sub>12</sub> } icosahedron. ....                                                                                 | 11 |
| <b>Fig. S7.</b> The <i>M-H</i> plot of Na <sub>4</sub> @Dy <sub>12</sub> @L <sub>20</sub> at different temperatures.....                                                                            | 12 |
| <b>Fig. S8.</b> The <i>M-HT<sup>-1</sup></i> plot of Na <sub>4</sub> @Dy <sub>12</sub> @L <sub>20</sub> at different temperatures. ....                                                             | 12 |
| <b>Fig. S9.</b> The χ'' signals of ac susceptibility of Na <sub>4</sub> @Dy <sub>12</sub> @L <sub>20</sub> collected under 2 K and different dc fields. ....                                        | 13 |
| <b>Fig. S10.</b> The χ' signals of ac susceptibility of Na <sub>4</sub> @Dy <sub>12</sub> @L <sub>20</sub> collected under 3.0 kOe dc field.....                                                    | 13 |
| <b>Table S7.</b> The relaxation parameters from the fitting of the Cole-Cole data of Na <sub>4</sub> @Dy <sub>12</sub> @L <sub>20</sub> . ....                                                      | 14 |
| <b>Fig. S11.</b> The Cole-Cole plot of Na <sub>4</sub> @Dy <sub>12</sub> @L <sub>20</sub> under 3.0 kOe field. ....                                                                                 | 15 |
| <b>Fig. S12.</b> The Arrhenius fitting to the ln(τ)- <i>T<sup>-1</sup></i> data of Na <sub>4</sub> @Dy <sub>12</sub> @L <sub>20</sub> . ....                                                        | 15 |
| <b>Fig. S13.</b> The <sup>1</sup> HNMR of the (EtO) <sub>2</sub> L. ....                                                                                                                            | 16 |
| <b>Fig. S14.</b> The <sup>1</sup> HNMR of the Na <sub>2</sub> L ligand.....                                                                                                                         | 17 |
| <b>Fig. S15.</b> The IR spectra of the Na <sub>2</sub> L ligand, Na <sub>4</sub> @Gd <sub>12</sub> @L <sub>20</sub> and Na <sub>4</sub> @Dy <sub>12</sub> @L <sub>20</sub> . ....                   | 18 |
| <b>Fig. S16.</b> The PXRD <b>patterns</b> of Na <sub>4</sub> @Gd <sub>12</sub> @L <sub>20</sub> and Na <sub>4</sub> @Dy <sub>12</sub> @L <sub>20</sub> .....                                        | 19 |
| <b>Fig. S17.</b> TG and DTG curves of Na <sub>4</sub> @Gd <sub>12</sub> @L <sub>20</sub> and Na <sub>4</sub> @Dy <sub>12</sub> @L <sub>20</sub> . ....                                              | 20 |
| <b>Table S8.</b> Crystal data and structure refinement parameters for Na <sub>4</sub> @Gd <sub>12</sub> @L <sub>20</sub> and Na <sub>4</sub> @Dy <sub>12</sub> @L <sub>20</sub> .....               | 21 |
| <b>Table S9.</b> Selected bond lengths and bond angles of Na <sub>4</sub> @Gd <sub>12</sub> @L <sub>20</sub> . ....                                                                                 | 22 |
| <b>Table S10.</b> Selected bond lengths and bond angles of Na <sub>4</sub> @Dy <sub>12</sub> @L <sub>20</sub> .....                                                                                 | 25 |

## Experimental Section

### General Materials and Methods

All reagents were of analytical grade and used as received without further purification.  $^1\text{H}$ NMR spectra were obtained on a BRUKER Ascend 500 (Figs. S13, S14). The  $^1\text{H}$  NMR (500 MHz) chemical shifts were measured relative to  $\text{CD}_2\text{Cl}_2$  as the internal reference. IR spectra were measured on a PerkinElmer Spectrum One Fourier transform infrared (FT-IR) spectrometer in the range of  $4000\text{-}400\text{ cm}^{-1}$  (Figs. S15). Elemental analysis for C, H, and N was conducted using a PerkinElmer model 2400 II elemental analyzer. Powder X-Ray Diffraction (PXRD) pattern was recorded using  $\text{Cu-K}\alpha$  radiation on a PANalytical X'Pert PRO diffractometer (Figs. S16). Thermogravimetric (TG) analysis was performed on a Netzsch STA 449C thermal analyzer from room temperature to  $800\text{ }^\circ\text{C}$  with a heating rate of  $10\text{ }^\circ\text{C min}^{-1}$  under a  $\text{N}_2$  atmosphere (Figs. S17). Magnetic measurements were performed on polycrystalline samples using a Quantum Design MPMS3 SQUID magnetometer. The variable-temperature magnetic susceptibility data were collected over  $300\text{-}2.0\text{ K}$ , and the isothermal magnetization measurements were carried out between 0 and 7 T. Dynamic ac susceptibilities were measured under different external direct-current (dc) fields with an ac field of 2 Oe and frequencies ranging from 1 to 1000 Hz.

### Synthesis of sodium *N, N'*-bis(oxoacetate)-(1*R*, 2*R*)-diaminocyclohexane ( $\text{Na}_2\text{L}$ )

1*R*, 2*R*-cyclohexanediamine (20 mmol) and triethylamine (40 mmol) was dissolved in 50 mL  $\text{CH}_2\text{Cl}_2$ . Ethyl chlorooxoacetate (40 mmol) was then added dropwise while maintaining the reaction solution at a low temperature. The resulting solution was stirred at room temperature for 1 hour, after which 10 mL saturated  $\text{NaHCO}_3$  aqueous solution was added to quench the reaction. The resultant mixture was extracted with 10 mL of  $\text{CH}_2\text{Cl}_2$  for three times, dried over anhydrous  $\text{MgSO}_4$ , and concentrated under reduced pressure. A brown oily liquid of diethyl *N, N'*-bis(oxoacetate)-(1*R*, 2*R*)-diaminocyclohexane [ $(\text{EtO})_2\text{L}$ ] was obtained with a yield of 51%.  $^1\text{H}$  NMR (500 MHz;  $\text{CD}_2\text{Cl}_2$ ):  $\delta$  7.47 (d,  $J = 8.2\text{ Hz}$ , 2H), 4.32 (q,  $J = 7.1\text{ Hz}$ , 4H), 4.19 (t,  $J = 8.3\text{ Hz}$ , 2H), 1.81 (d,  $J = 13.3\text{ Hz}$ , 2H), 1.63 (dd,  $J = 13.3, 7.7\text{ Hz}$ , 2H), 1.59-1.51 (m, 4H), 1.36 (t,  $J = 7.2\text{ Hz}$ , 6H). IR (KBr,  $\text{cm}^{-1}$ ):  $\nu = 3477$  (s), 2836 (m), 2734 (m), 1621 (s), 1357 (s), 1170 (w), 1106 (w), 985 (w), 777 (m), 572 (w).

Subsequently, (EtO)<sub>2</sub>L (4.78 mmol) and NaOH (9.56 mmol) was dissolved in 40 mL anhydrous CH<sub>3</sub>OH. After refluxing for 1 h, a white precipitate of sodium *N, N'*-bis(oxoacetate)-(1*R*, 2*R*)-diaminocyclohexane (Na<sub>2</sub>L) was formed. The precipitate was then flited out, washed with CH<sub>3</sub>OH, and dried in vacuum. Yield: 46%. <sup>1</sup>H NMR (500 MHz; CD<sub>2</sub>Cl<sub>2</sub>): δ 4.15-4.03 (m, 2H), 1.71 (dq, J = 10.8, 6.8, 5.5 Hz, 4H), 1.67-1.57 (m, 2H), 1.51 (t, J = 6.0 Hz, 2H). IR (KBr, cm<sup>-1</sup>): ν = 3477 (s), 2836 (m), 2734 (m), 1621 (s), 1357 (s), 1170 (w), 1106 (w), 985 (w), 777 (m), 572 (w) .

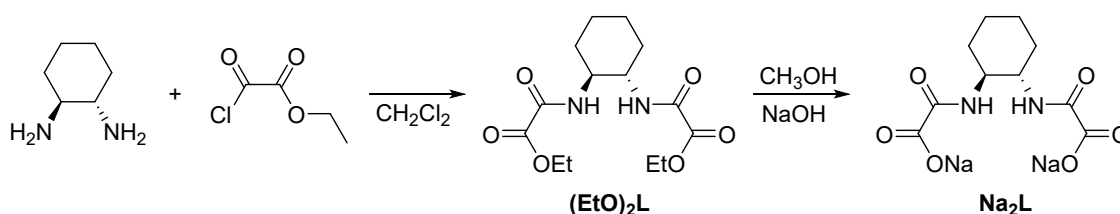

**Scheme S1** The synthesis route of Na<sub>2</sub>L.

### Synthesis of Na<sub>4</sub>@Gd<sub>12</sub>@L<sub>20</sub> and Na<sub>4</sub>@Dy<sub>12</sub>@L<sub>20</sub>

A mixture of Na<sub>2</sub>L (0.2 mmol), Ln(NO<sub>3</sub>)<sub>3</sub>·6H<sub>2</sub>O (0.1 mmol) and anthracene-9-carboxylic acid (0.1 mmol) was added into a Teflon liner of vessel. After addition of 2 mL acetonitrile, 2 mL methanol, and 2 mL deionized water, the resultant solution was stirred at room temperature for 30 minutes, followed by the addition of 3 drops of triethylamine. Then the reaction solution was sealed and kept in a 100 °C oven for 72 h. Colorless octahedral crystals were obtained upon cooling to room temperature.

[Na<sub>4</sub>Gd<sub>12</sub>L<sub>20</sub>(H<sub>2</sub>O)<sub>6</sub>]·38H<sub>2</sub>O (**Na<sub>4</sub>@Gd<sub>12</sub>@L<sub>20</sub>**). Yield: 42% (based on Gd salt). Anal. Calcd. for C<sub>348</sub>H<sub>296</sub>Gd<sub>10</sub>N<sub>26</sub>O<sub>74</sub>: C, 33.15; H, 3.56; N, 7.73%; expl.: C, 33.24; H, 3.27; N, 7.54. IR (KBr, cm<sup>-1</sup>): ν = 1648 (s), 1548 (m), 1392 (m), 1250 (s), 1141(w), 1092 (w), 941 (m), 898 (w) .

[Na<sub>4</sub>Dy<sub>12</sub>L<sub>20</sub>(H<sub>2</sub>O)<sub>6</sub>]·20H<sub>2</sub>O·CH<sub>3</sub>CN (**Na<sub>4</sub>@Dy<sub>12</sub>@L<sub>20</sub>**). Yield: 47% (based on Dy salt). Anal. Calcd. for C<sub>348</sub>H<sub>296</sub>Dy<sub>10</sub>N<sub>26</sub>O<sub>74</sub>: C, 33.15; H, 3.56; N, 7.73%; expl.C, 33.24; H, 3.27; N, 7.54. IR (KBr, cm<sup>-1</sup>): ν = 1651 (s), 1549 (m), 1392 (m), 1251 (s), 1141(w), 1092 (w), 941 (m), 898 (w) .

### Single-crystal X-ray Crystallography

All data were collected on an Agilent Supernova diffractometer by using graphite-monochromatized

Mo K $\alpha$  radiation ( $\lambda = 0.710 \text{ \AA}$ ). The absorption effect was corrected by semiempirical methods. The absorption effect was corrected with a semiempirical method. The structures were solved by direct methods and refined by full-matrix least-squares method with a suite of SHELX programs *via* the Olex2 interface.<sup>S1-S4</sup> All non-hydrogen atoms were refined anisotropically. The hydrogen atoms were placed in calculated positions and refined by using a riding model. The final cycle of full-matrix least-squares refinement was performed referring to observed reflections and variable parameters. Some serious disordered solvent molecules in the lattice were treated using the solvent mask of Olex2 software during the structural refinement.

CCDC 2537667 (**Na<sub>4</sub>@Gd<sub>12</sub>@L<sub>20</sub>**) and CCDC 2537668 (**Na<sub>4</sub>@Dy<sub>12</sub>@L<sub>20</sub>**) contain supplementary crystallographic data for this paper. These data can be obtained free of charge via [www.ccdc.cam.ac.uk/data\\_request/cif](http://www.ccdc.cam.ac.uk/data_request/cif). The crystallographic data and relevant refinement parameters are given in Table S8. Selected structural parameters are given in Tables S9, S10.

## Reference

- S1 G. M. Sheldrick, *SHELX-2014: Programs for crystal structure analysis*, University of Göttingen, Göttingen, Germany, **2014**.
- S2 G. M. Sheldrick, Crystal structure refinement with SHELXL, *Acta Crystallogr., Sect. C: Struct. Chem.*, 2015, **C71**, 3–8.
- S3 O. V. Dolomanov, L. J. Bourhis, R. J. Gildea, J. A. K. Howard and H. Puschmann, OLEX2: A Complete Structure Solution, Refinement and Analysis Program, *J. Appl. Crystallogr.*, 2009, **42**, 339–341.
- S4 L. J. Bourhis, O. V. Dolomanov, R. J. Gildea, J. A. K. Howard and H. Puschmann, The Anatomy of a Comprehensive Constrained, Restrained Refinement Program for the Modern Computing Environment-Olex2 Dissected, *Acta Crystallogr., Sect. A: Found. Adv.*, 2015, **A71**, 59–75.

## Supplementary Figures and Tables

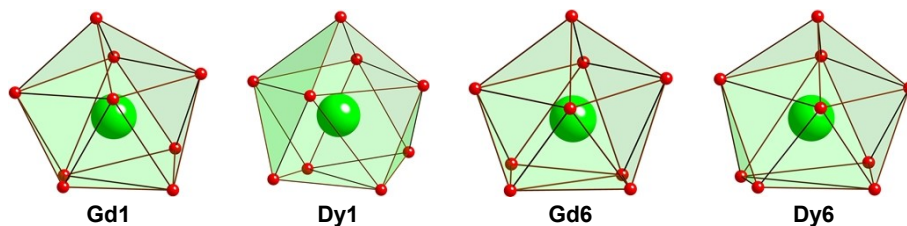

**Fig. S1.** Coordination geometries of Ln1 and Ln6 ions (Ln = Gd, Dy).

**Table S1.** Calculated CShM parameters of Ln1 and Ln6 ions (Ln = Gd, Dy).

| Configuration                            | Symmetry                   | CShM values  |              |              |              |
|------------------------------------------|----------------------------|--------------|--------------|--------------|--------------|
|                                          |                            | Gd1          | Dy1          | Gd6          | Dy6          |
| Enneagon                                 | $D_{9h}$                   | 36.806       | 36.853       | 36.751       | 36.838       |
| Octagonal pyramid                        | $C_{8v}$                   | 22.221       | 22.162       | 21.618       | 21.661       |
| Heptagonal bipyramid                     | $D_{7h}$                   | 19.163       | 19.119       | 19.129       | 19.177       |
| Johnson triangular cupola J3             | $O_{3v}$                   | 16.050       | 16.021       | 15.593       | 15.520       |
| Capped cube J8                           | $C_{4v}$                   | 9.893        | 9.771        | 9.358        | 9.338        |
| Spherical-relaxed capped cube            | $C_{4v}$                   | 8.762        | 8.680        | 8.197        | 8.185        |
| Capped square antiprism J10              | $C_{4v}$                   | 1.532        | 1.474        | 1.592        | 1.577        |
| <b>Spherical capped square antiprism</b> | <b><math>C_{4v}</math></b> | <b>0.628</b> | <b>0.610</b> | <b>0.717</b> | <b>0.707</b> |
| Tricapped trigonal prism J51             | $D_{3h}$                   | 2.385        | 2.403        | 3.345        | 3.367        |
| Spherical tricapped trigonal prism       | $D_{3h}$                   | 0.770        | 0.811        | 1.491        | 1.508        |
| Tridiminished icosahedron J63            | $C_{3v}$                   | 12.734       | 12.698       | 11.950       | 11.964       |
| Hula-hoop                                | $C_{2v}$                   | 11.560       | 11.451       | 11.376       | 11.373       |
| Muffin                                   | $C_s$                      | 0.929        | 0.926        | 1.084        | 1.047        |

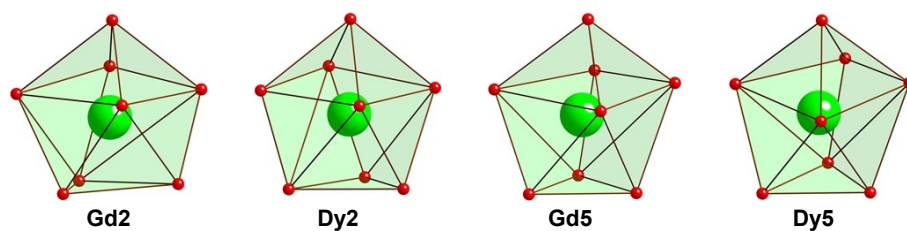

**Fig. S2.** Coordination geometries of Ln2 and Ln5 ions (Ln = Gd, Dy).

**Table S2.** Calculated CShM parameters of Ln2 and Ln5 ions (Ln = Gd, Dy).

| Configuration                              | Symmetry                   | CShM values  |              |              |              |
|--------------------------------------------|----------------------------|--------------|--------------|--------------|--------------|
|                                            |                            | Gd2          | Dy2          | Gd5          | Dy5          |
| Octagon                                    | $D_{8h}$                   | 28.688       | 28.568       | 27.822       | 27.887       |
| Heptagonal pyramid                         | $C_{7v}$                   | 23.172       | 23.328       | 23.443       | 23.523       |
| Hexagonal bipyramid                        | $D_{6h}$                   | 16.204       | 16.148       | 17.002       | 17.111       |
| Cube                                       | $O_h$                      | 11.201       | 11.157       | 11.597       | 11.466       |
| Square antiprism                           | $C_{4d}$                   | 1.977        | 1.834        | 1.494        | 1.483        |
| <b>Triangular dodecahedron</b>             | <b><math>C_{2d}</math></b> | <b>1.324</b> | <b>1.353</b> | <b>1.364</b> | <b>1.308</b> |
| Johnson gyrobifastigium J26                | $C_{2d}$                   | 13.368       | 13.546       | 14.212       | 14.253       |
| Johnson elongated triangular bipyramid J14 | $C_{3h}$                   | 26.330       | 26.317       | 26.425       | 26.505       |
| Biaugmented trigonal prism J50             | $D_{2v}$                   | 2.229        | 2.213        | 1.999        | 2.157        |
| Biaugmented trigonal prism                 | $D_{2v}$                   | 1.720        | 1.709        | 3.361        | 1.944        |
| Snub diphenooid J84                        | $C_{2d}$                   | 3.455        | 3.518        | 12.421       | 3.312        |
| Triakis tetrahedron                        | $T_d$                      | 12.000       | 11.957       | 21.936       | 12.298       |
| Elongated trigonal bipyramid               | $D_{3h}$                   | 22.029       | 22.000       | 22.045       | 22.045       |

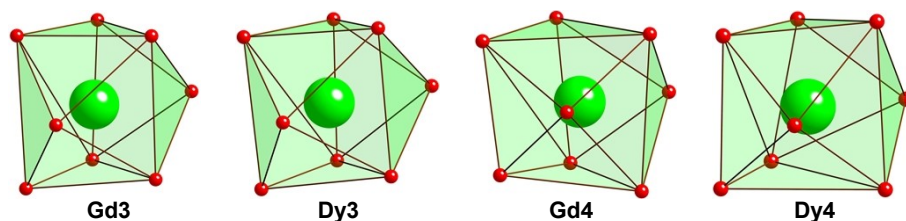

**Fig. S3.** Coordination geometries of Ln3 and Ln4 ions (Ln = Gd, Dy).

**Table S3.** Calculated CShM parameters of Ln3 and Ln4 ions (Ln = Gd, Dy).

| Configuration                              | Symmetry                   | CShM values  |              |              |              |
|--------------------------------------------|----------------------------|--------------|--------------|--------------|--------------|
|                                            |                            | Gd3          | Dy3          | Gd4          | Dy4          |
| Octagon                                    | $D_{8h}$                   | 26.951       | 27.187       | 30.640       | 30.793       |
| Heptagonal pyramid                         | $C_{7v}$                   | 20.905       | 21.499       | 22.230       | 22.335       |
| Hexagonal bipyramid                        | $D_{6h}$                   | 17.117       | 16.889       | 16.460       | 16.357       |
| Cube                                       | $O_h$                      | 14.073       | 13.678       | 11.893       | 11.832       |
| Square antiprism                           | $C_{4d}$                   | 3.278        | 2.892        | 2.485        | 2.515        |
| Triangular dodecahedron                    | $C_{2d}$                   | 2.825        | 2.571        | 1.775        | 1.765        |
| Johnson gyrobifastigium J26                | $C_{2d}$                   | 12.535       | 12.627       | 13.503       | 13.347       |
| Johnson elongated triangular bipyramid J14 | $C_{3h}$                   | 25.712       | 26.089       | 25.922       | 26.377       |
| Biaugmented trigonal prism J50             | $D_{2v}$                   | 1.750        | 1.575        | 2.048        | 1.987        |
| <b>Biaugmented trigonal prism</b>          | <b><math>D_{2v}</math></b> | <b>1.073</b> | <b>0.966</b> | <b>1.390</b> | <b>1.299</b> |
| Snub diphenooid J84                        | $C_{2d}$                   | 4.009        | 3.814        | 3.908        | 3.967        |
| Triakis tetrahedron                        | $T_d$                      | 14.580       | 14.189       | 12.688       | 12.609       |
| Elongated trigonal bipyramid               | $D_{3h}$                   | 22.550       | 22.874       | 21.462       | 21.903       |

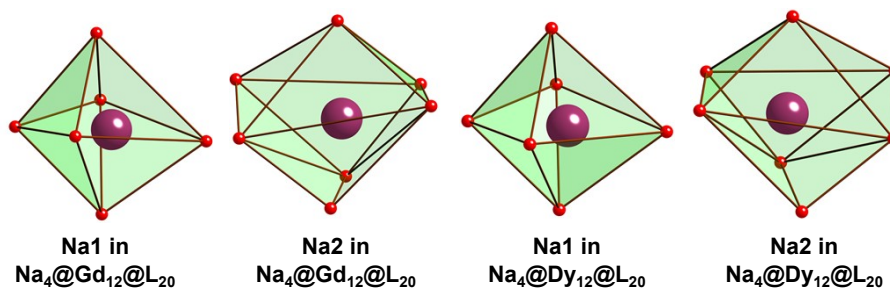

**Fig. S4.** Coordination geometries of Na ions.

**Table S4.** Calculated CShM parameters of Na ions.

| Configurations                          | Symmetry | CShM values                                       |                                                   |
|-----------------------------------------|----------|---------------------------------------------------|---------------------------------------------------|
|                                         |          | Na1 in $\text{Na}_4@\text{Gd}_{12}@\text{L}_{20}$ | Na1 in $\text{Na}_4@\text{Dy}_{12}@\text{L}_{20}$ |
| Hexagon                                 | $D_{6h}$ | 32.377                                            | 32.507                                            |
| Pentagonal pyramid                      | $C_{5v}$ | 23.480                                            | 23.606                                            |
| <b>Octahedron</b>                       | $O_h$    | <b>3.758</b>                                      | <b>3.631</b>                                      |
| Trigonal prism                          | $D_{3h}$ | 13.205                                            | 13.031                                            |
| Johnson pentagonal pyramid J2           | $C_{5v}$ | 25.597                                            | 25.719                                            |
|                                         | Symmetry | CShM values                                       |                                                   |
| Configurations                          |          | Na2 in $\text{Na}_4@\text{Gd}_{12}@\text{L}_{20}$ | Na2 in $\text{Na}_4@\text{Dy}_{12}@\text{L}_{20}$ |
| Heptagon                                | $D_{7h}$ | 33.502                                            | 32.795                                            |
| Hexagonal pyramid                       | $C_{6v}$ | 14.422                                            | 14.285                                            |
| Pentagonal bipyramid                    | $D_{5h}$ | 12.149                                            | 12.337                                            |
| <b>Capped octahedron</b>                | $C_{3v}$ | <b>5.339</b>                                      | <b>5.226</b>                                      |
| Capped trigonal prism                   | $C_{2v}$ | 6.480                                             | 6.457                                             |
| Johnson pentagonal bipyramid J13        | $D_{5h}$ | 15.581                                            | 15.856                                            |
| Johnson elongated triangular pyramid J7 | $C_{3v}$ | 14.520                                            | 14.208                                            |

**Table S5.** The distances between the adjacent Ln<sup>III</sup> ions in Na<sub>4</sub>@Gd<sub>12</sub>@L<sub>20</sub> and Na<sub>4</sub>@Dy<sub>12</sub>@L<sub>20</sub>.

| Distances | Length/Å  | Distances | Length/Å  | Distances              | Length/Å  | Distances              | Length/Å  |
|-----------|-----------|-----------|-----------|------------------------|-----------|------------------------|-----------|
| Gd1···Gd2 | 7.4065(1) | Gd1···Gd6 | 6.3577(1) | Gd1···Gd3 <sup>i</sup> | 6.0821(1) | Gd1···Gd4 <sup>i</sup> | 6.4006(1) |
| Gd2···Gd3 | 7.1728(1) | Gd2···Gd6 | 6.2285(1) | Gd2···Gd4 <sup>i</sup> | 6.2269(1) | Gd2···Gd5 <sup>i</sup> | 6.2238(1) |
| Gd3···Gd4 | 7.5207(1) | Gd3···Gd6 | 7.0593(1) | Gd3···Gd1 <sup>i</sup> | 6.0821(1) | Gd3···Gd5 <sup>i</sup> | 6.3946(1) |
| Gd4···Gd5 | 6.5297(1) | Gd4···Gd6 | 6.3830(1) | Gd4···Gd1 <sup>i</sup> | 6.4006(1) | Gd4···Gd2 <sup>i</sup> | 6.2269(1) |
| Gd5···Gd1 | 6.4078(1) | Gd5···Gd6 | 6.2485(1) | Gd5···Gd2 <sup>i</sup> | 6.2238(1) | Gd5···Gd3 <sup>i</sup> | 6.3946(1) |
| Distances | Length/Å  | Distances | Length/Å  | Distances              | Length/Å  | Distances              | Length/Å  |
| Dy1···Dy2 | 7.3821(0) | Dy1···Dy6 | 6.3436(0) | Dy1···Dy3 <sup>i</sup> | 6.0666(0) | Dy1···Dy4 <sup>i</sup> | 6.3962(0) |
| Dy2···Dy3 | 7.1467(0) | Dy2···Dy6 | 6.2129(0) | Dy2···Dy4 <sup>i</sup> | 6.1929(1) | Dy2···Dy5 <sup>i</sup> | 6.2011(0) |
| Dy3···Dy4 | 7.5564(0) | Dy3···Dy6 | 7.0455(1) | Dy3···Dy1 <sup>i</sup> | 6.0666(0) | Dy3···Dy5 <sup>i</sup> | 6.3714(0) |
| Dy4···Dy5 | 6.4992(0) | Dy4···Dy6 | 6.3771(0) | Dy4···Dy1 <sup>i</sup> | 6.3962(0) | Dy4···Dy2 <sup>i</sup> | 6.1929(1) |
| Dy5···Dy1 | 3.3788(1) | Dy5···Dy6 | 6.2429(0) | Dy5···Dy2 <sup>i</sup> | 6.2011(0) | Dy5···Dy3 <sup>i</sup> | 6.3714(0) |

**Table S6.** The distances between Ln<sup>III</sup> ion and meaning center of Na<sub>4</sub>@Gd<sub>12</sub>@L<sub>20</sub> and Na<sub>4</sub>@Dy<sub>12</sub>@L<sub>20</sub>.

| Distances    | Length/Å  | Distances    | Length/Å  | Distances    | Length/Å  |
|--------------|-----------|--------------|-----------|--------------|-----------|
| Gd1···Center | 6.3211(1) | Gd3···Center | 7.1021(1) | Gd5···Center | 6.2097(1) |
| Gd2···Center | 6.4605(1) | Gd4···Center | 6.2253(1) | Gd6···Center | 5.0138(1) |
| Distances    | Length/Å  | Distances    | Length/Å  | Distances    | Length/Å  |
| Dy1···Center | 6.2865(0) | Dy3···Center | 7.0967(0) | Dy5···Center | 6.1947(0) |
| Dy2···Center | 6.4395(0) | Dy4···Center | 6.2227(0) | Dy6···Center | 5.0052(0) |

symmetric code: (i) 1-x, 1-y, 1-z.

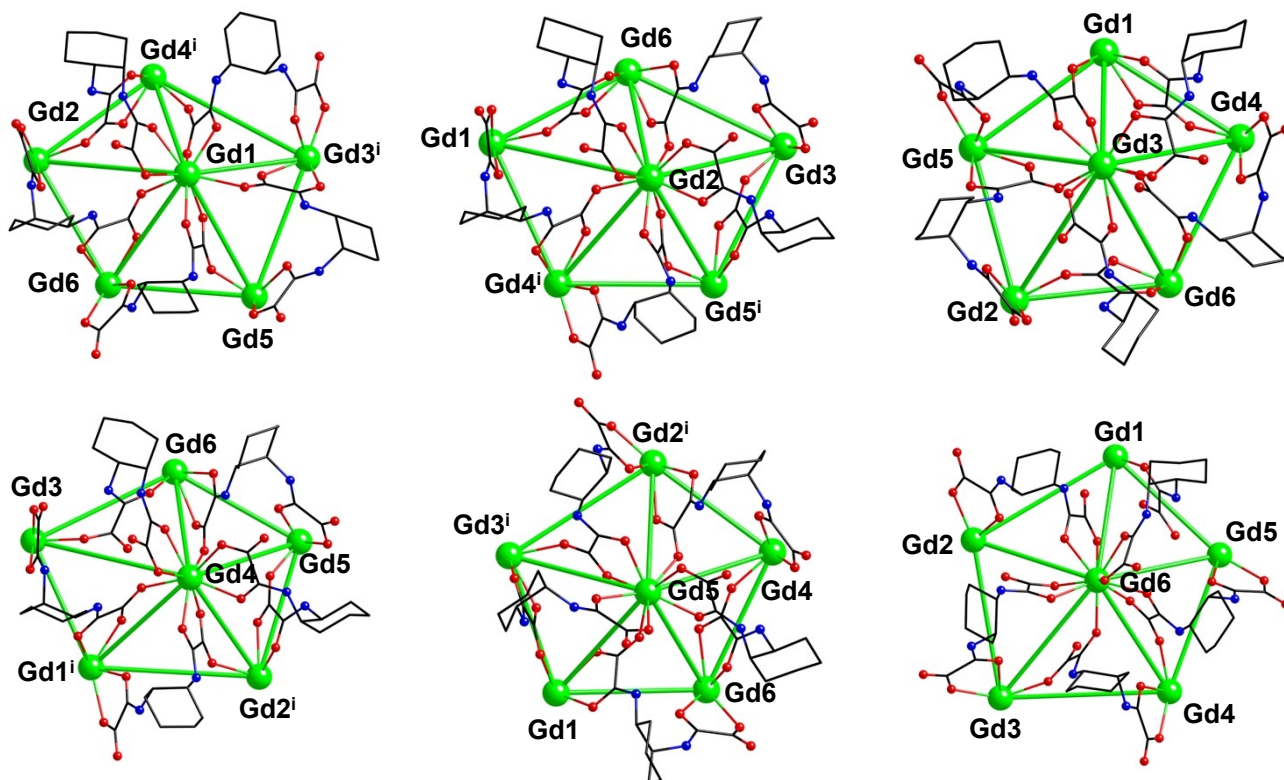

Fig. S5. Five ligands and five adjacent Gd ions linked with each Gd ion. Symmetric code: (i) 1-x, 1-y, 1-z.

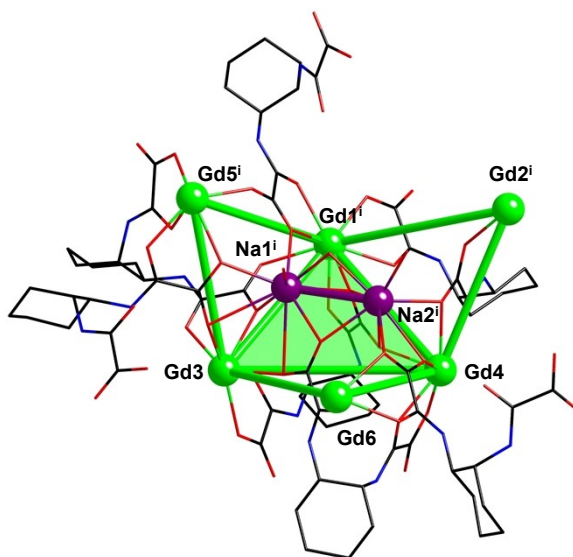

Fig. S6. The linkage between  $\{Na_2\}$  unit and inner wall of  $\{Gd_{12}\}$  icosahedron. Symmetric code: (i) 1-x, 1-y, 1-z.

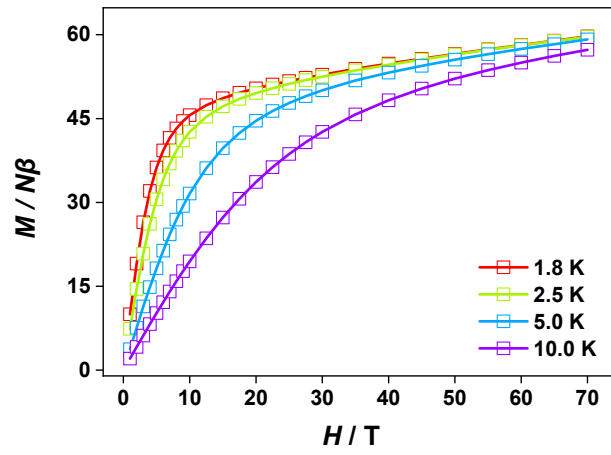

Fig. S7. The  $M$ - $H$  plot of  $\text{Na}_4@Dy_{12}@L_{20}$  at different temperatures.

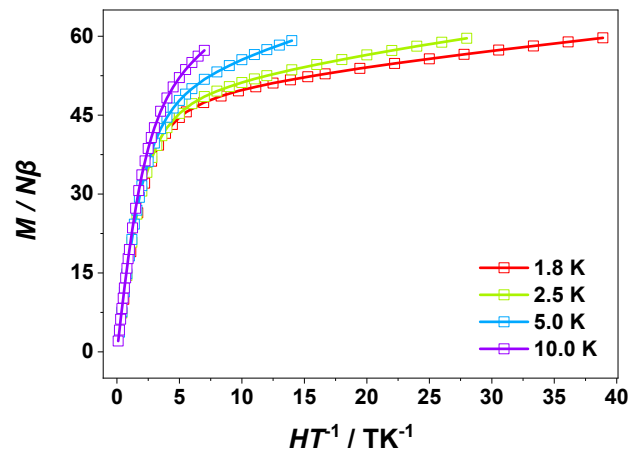

Fig. S8. The  $M$ - $HT^{-1}$  plot of  $\text{Na}_4@Dy_{12}@L_{20}$  at different temperatures.

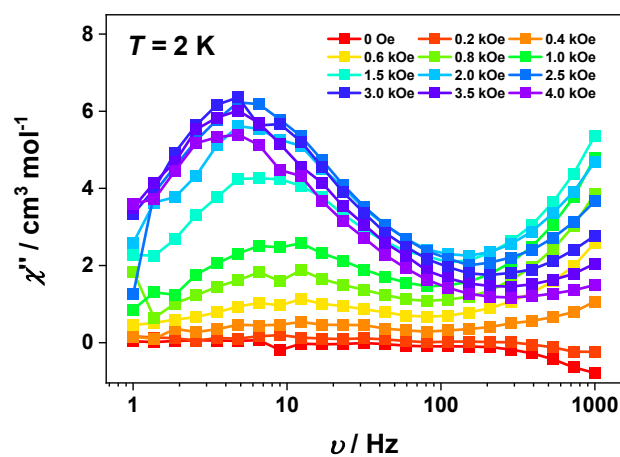

Fig. S9. The  $\chi''$  signals of ac susceptibility of  $\text{Na}_4@Dy_{12}@L_{20}$  collected under 2 K and different dc fields.

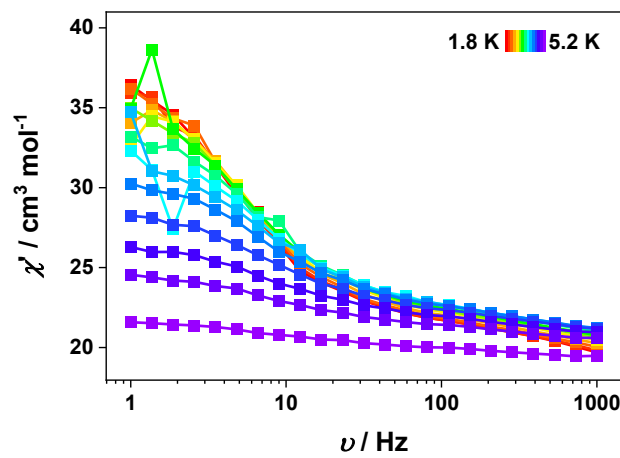

Fig. S10. The  $\chi'$  signals of ac susceptibility of  $\text{Na}_4@Dy_{12}@L_{20}$  collected under 3.0 kOe dc field.

**Table S7.** The relaxation parameters from the fitting of the Cole-Cole data of  $\text{Na}_4@Dy_{12}@L_{20}$ .

| T/K | $\chi_s$    | $\Delta\chi_1$ | $\tau_1$   | $\alpha_1$ | $\Delta\chi_2$ | $\tau_2$ | $\alpha_2$ |
|-----|-------------|----------------|------------|------------|----------------|----------|------------|
| 1.8 | 2.43214E-14 | 21.7564        | 1.48984E-5 | 0.31071    | 16.7932        | 0.03547  | 0.1664     |
| 1.9 | 8.99314E-6  | 21.7348        | 1.27944E-5 | 0.32247    | 16.4649        | 0.03412  | 0.16771    |
| 2   | 3.13955E-14 | 22.1812        | 9.05789E-6 | 0.39946    | 15.4576        | 0.03182  | 0.14026    |
| 2.1 | 5.18517E-10 | 22.0681        | 8.58205E-6 | 0.36988    | 15.4473        | 0.03145  | 0.1746     |
| 2.2 | 4.54714E-13 | 22.3189        | 6.91109E-6 | 0.3995     | 14.8628        | 0.03074  | 0.17612    |
| 2.3 | 1.15295E-13 | 22.7179        | 5.07378E-6 | 0.459      | 13.4199        | 0.02849  | 0.15165    |
| 2.4 | 2.08061E-5  | 22.6831        | 4.75303E-6 | 0.44792    | 13.517         | 0.02878  | 0.17427    |
| 2.6 | 6.20712E-14 | 22.652         | 4.29269E-6 | 0.42882    | 11.8657        | 0.02468  | 0.18474    |
| 2.8 | 0.06812     | 22.944         | 2.88827E-6 | 0.49403    | 10.4394        | 0.02477  | 0.16902    |
| 3   | 4.78582E-5  | 23.0675        | 2.26418E-6 | 0.51553    | 9.04835        | 0.02238  | 0.16466    |
| 3.2 | 2.24914E-13 | 22.8471        | 2.2568E-6  | 0.49223    | 8.23834        | 0.02283  | 0.18951    |
| 3.6 | 4.64288E-13 | 22.6017        | 1.75494E-6 | 0.49374    | 6.22817        | 0.0215   | 0.19117    |
| 4   | 1.15466E-13 | 22.2349        | 1.07579E-6 | 0.52184    | 4.47939        | 0.02091  | 0.19591    |
| 4.4 | 1.58694E-13 | 21.6295        | 7.43594E-7 | 0.52174    | 3.29105        | 0.02177  | 0.21685    |
| 5.2 | 2.25483E-13 | 20.2565        | 1.68706E-7 | 0.58421    | 1.5566         | 0.02217  | 0.2139     |

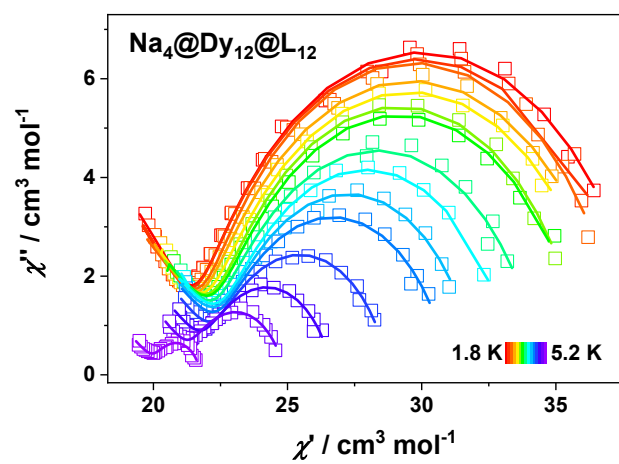

Fig. S11. The Cole-Cole plot of  $\text{Na}_4@Dy_{12}@L_{20}$  under 3.0 kOe field.

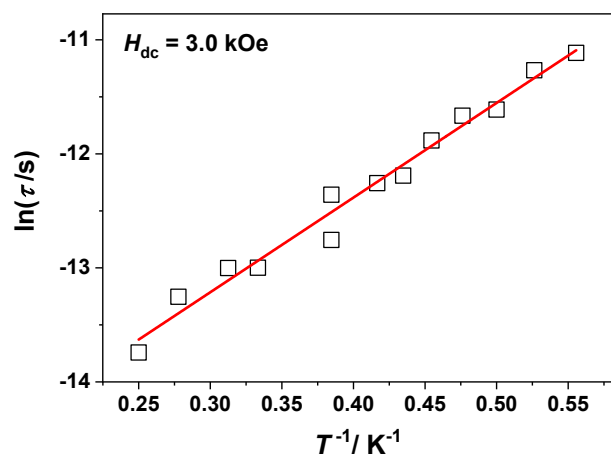

Fig. S12. The Arrhenius fitting to the  $\ln(\tau)-T^{-1}$  data of  $\text{Na}_4@Dy_{12}@L_{20}$ .

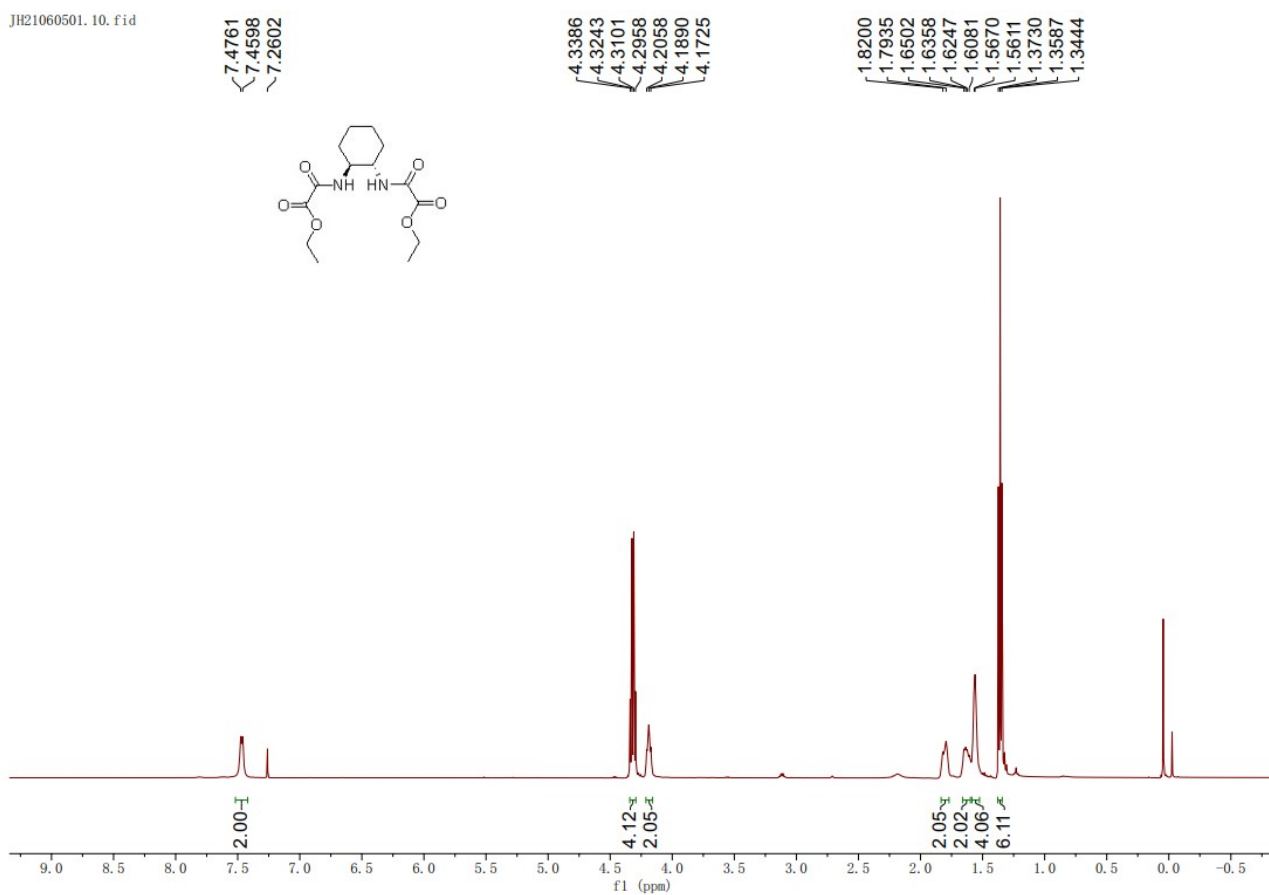

**Fig. S13.** The <sup>1</sup>H NMR of the (EtO)<sub>2</sub>L.

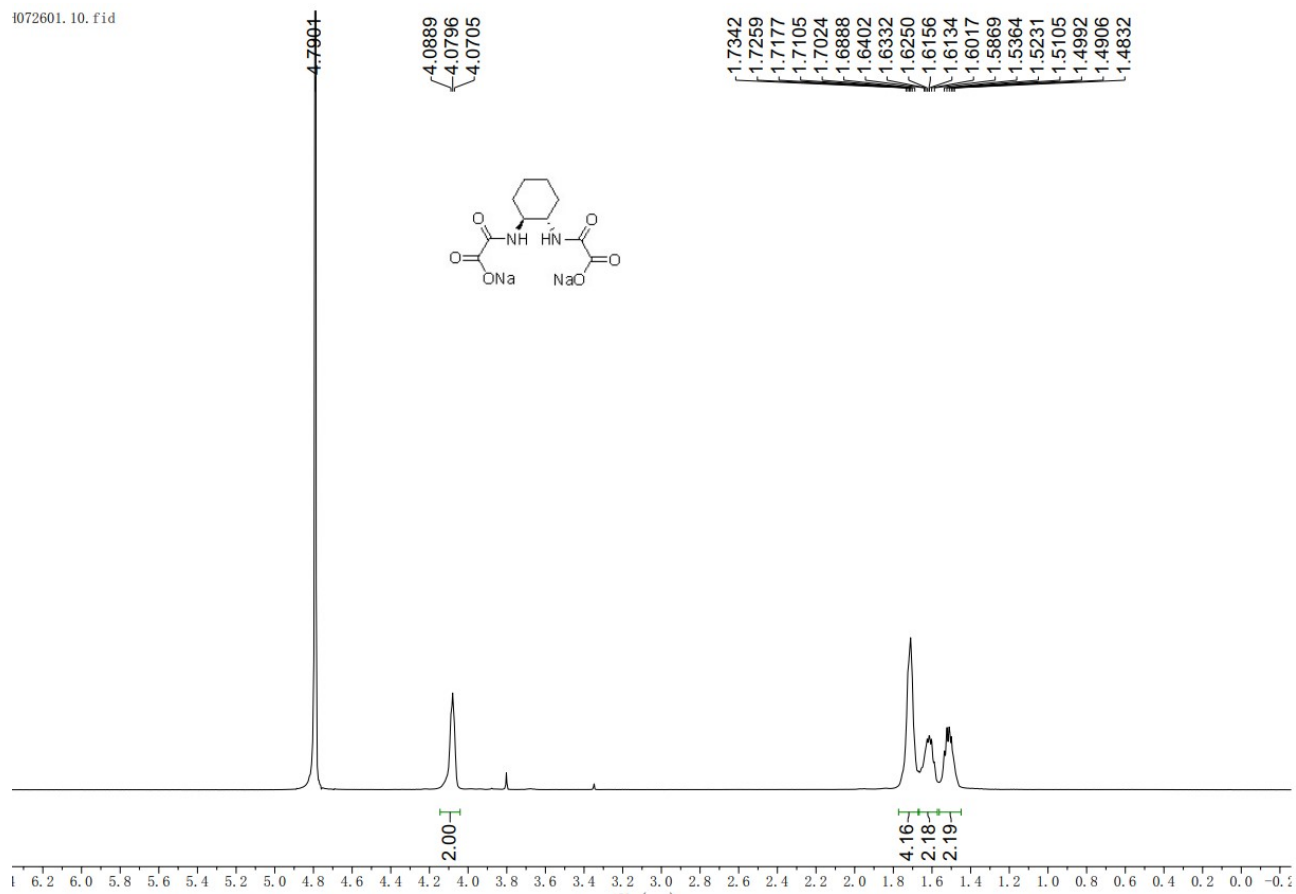

Fig. S14. The <sup>1</sup>H NMR of the Na<sub>2</sub>L ligand.

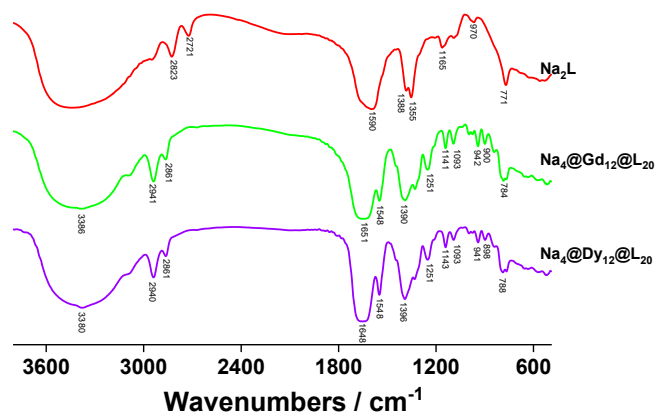

**Fig. S15.** The IR spectra of the Na<sub>2</sub>L ligand, Na<sub>4</sub>@Gd<sub>12</sub>@L<sub>20</sub> and Na<sub>4</sub>@Dy<sub>12</sub>@L<sub>20</sub>.

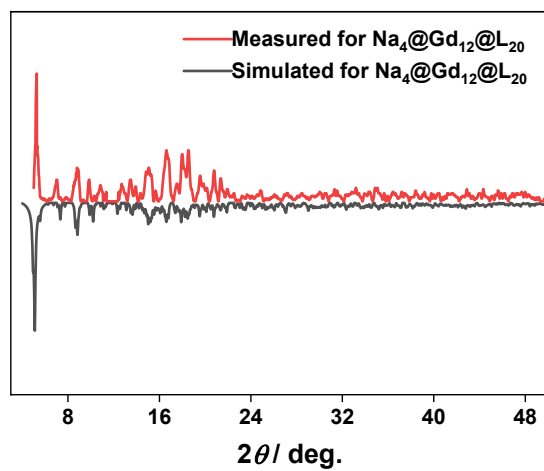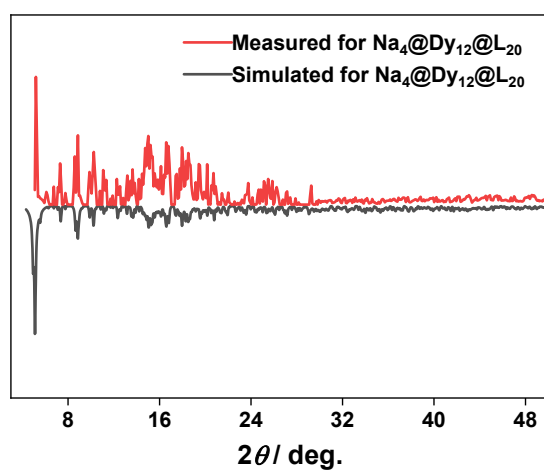

Fig. S16. The PXR D patterns of  $\text{Na}_4@Gd_{12}@L_{20}$  and  $\text{Na}_4@Dy_{12}@L_{20}$ .

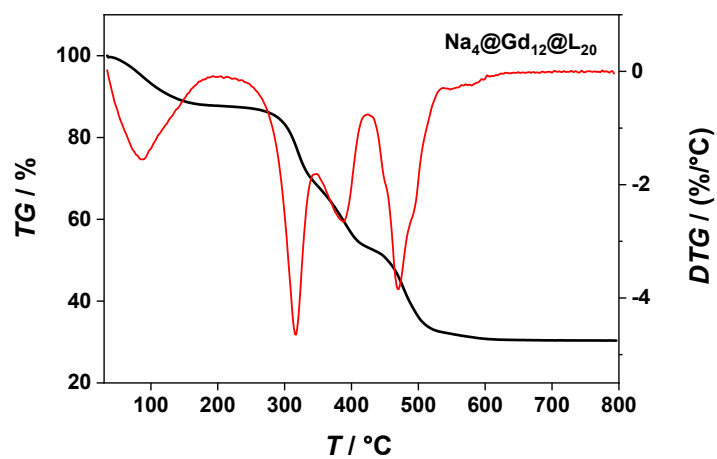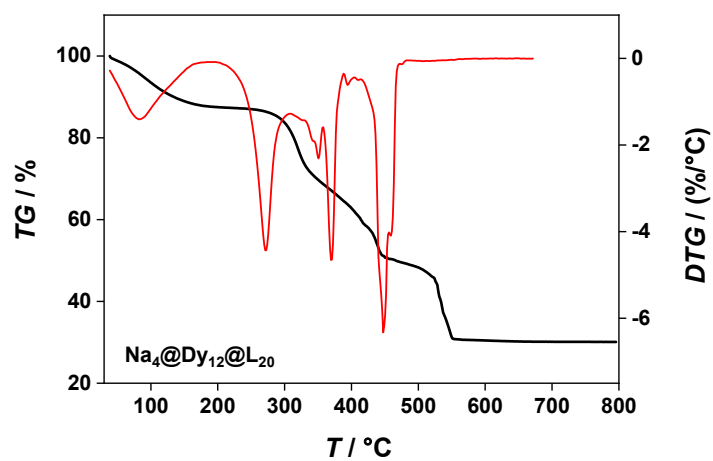

Fig. S17. TG and DTG curves of Na<sub>4</sub>@Gd<sub>12</sub>@L<sub>20</sub> and Na<sub>4</sub>@Dy<sub>12</sub>@L<sub>20</sub>.

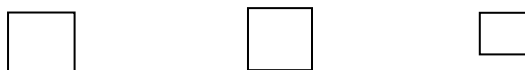

**Table S8.** Crystal data and structure refinement parameters for **Na<sub>4</sub>@Gd<sub>12</sub>@L<sub>20</sub>** and **Na<sub>4</sub>@Dy<sub>12</sub>@L<sub>20</sub>**.

| Entries                                                                                 | Na <sub>4</sub> @Gd <sub>12</sub> @L <sub>20</sub>                                                  | Na <sub>4</sub> @Dy <sub>12</sub> @L <sub>20</sub>                                                  |
|-----------------------------------------------------------------------------------------|-----------------------------------------------------------------------------------------------------|-----------------------------------------------------------------------------------------------------|
| Empirical formulas                                                                      | C <sub>200</sub> H <sub>330</sub> Gd <sub>12</sub> N <sub>40</sub> Na <sub>4</sub> O <sub>165</sub> | C <sub>202</sub> H <sub>295</sub> Dy <sub>12</sub> N <sub>41</sub> Na <sub>4</sub> O <sub>146</sub> |
| Crystal system                                                                          | Orthorhombic                                                                                        | Orthorhombic                                                                                        |
| Space group                                                                             | <i>Pbca</i>                                                                                         | <i>Pbca</i>                                                                                         |
| <i>a</i> /Å                                                                             | 34.7514(6)                                                                                          | 34.5969(3)                                                                                          |
| <i>b</i> /Å                                                                             | 24.0954(5)                                                                                          | 24.0825(2)                                                                                          |
| <i>c</i> /Å                                                                             | 35.7122(5)                                                                                          | 35.6956(3)                                                                                          |
| <i>α</i> /°                                                                             | 90                                                                                                  | 90                                                                                                  |
| <i>β</i> /°                                                                             | 90                                                                                                  | 90                                                                                                  |
| <i>γ</i> /°                                                                             | 90                                                                                                  | 90                                                                                                  |
| <i>V</i> /Å <sup>3</sup>                                                                | 29903.6(9)                                                                                          | 29740.9(4)                                                                                          |
| <i>Z</i>                                                                                | 4                                                                                                   | 4                                                                                                   |
| <i>ρ</i> <sub>calc</sub> g/cm <sup>3</sup>                                              | 1.758                                                                                               | 1.714                                                                                               |
| <i>μ</i> /mm <sup>-1</sup>                                                              | 2.74                                                                                                | 3.08                                                                                                |
| <i>F</i> (000)                                                                          | 15768                                                                                               | 15192                                                                                               |
| Reflections collected                                                                   | 82744                                                                                               | 89365                                                                                               |
| Independent reflections                                                                 | 20533                                                                                               | 25874                                                                                               |
| <i>R</i> <sub>int</sub>                                                                 | 0.062                                                                                               | 0.034                                                                                               |
| Data/restraints/parameters                                                              | 27310/0/1736                                                                                        | 34220/0/1725                                                                                        |
| Goodness-of-fit on <i>F</i> <sup>2</sup>                                                | 1.04                                                                                                | 1.03                                                                                                |
| <i>R</i> <sub>1</sub> , <i>wR</i> <sub>2</sub> [ <i>I</i> ≥ 2( <i>I</i> )] <sup>a</sup> | 0.0466, 0.0929                                                                                      | 0.0375, 0.0797                                                                                      |
| <i>R</i> <sub>1</sub> , <i>wR</i> <sub>2</sub> [all data] <sup>b</sup>                  | 0.0664, 0.1055                                                                                      | 0.0589, 0.0909                                                                                      |

$$^a R_1 = \frac{\sum ||F_o| - |F_c||}{\sum |F_o|}, \quad ^b wR_2 = \frac{[\sum w(|F_o|^2 - |F_c|^2)^2]}{\sum w(|F_o|^2)^2}]^{1/2}$$

**Table S9.** Selected bond lengths and bond angles of  $\text{Na}_4@Gd_{12}@L_{20}$ .

| <b>Bond</b>                            | <b>Length/Å</b>  | <b>Bond</b>              | <b>Length/Å</b>  | <b>Bond</b>               | <b>Length/Å</b>  |
|----------------------------------------|------------------|--------------------------|------------------|---------------------------|------------------|
| Gd1-O2                                 | 2.505(4)         | Gd3-O12                  | 2.378(5)         | Gd5-O11 <sup>i</sup>      | 2.461(4)         |
| Gd1-O3                                 | 2.480(4)         | Gd3-O14                  | 2.384(5)         | Gd5-O24                   | 2.333(4)         |
| Gd1-O16 <sup>i</sup>                   | 2.391(4)         | Gd3-O15                  | 2.420(5)         | Gd5-O26                   | 2.402(4)         |
| Gd1-O17 <sup>i</sup>                   | 2.471(4)         | Gd3-O28 <sup>i</sup>     | 2.430(4)         | Gd5-O27                   | 2.422(4)         |
| Gd1-O30                                | 2.525(4)         | Gd3-O29 <sup>i</sup>     | 2.459(4)         | Gd5-O52                   | 2.382(4)         |
| Gd1-O31                                | 2.357(4)         | Gd3-O40                  | 2.501(4)         | Gd5-O53                   | 2.427(5)         |
| Gd1-O56                                | 2.469(4)         | Gd3-O42                  | 2.404(5)         | Gd5-O55                   | 2.286(4)         |
| Gd1-O57                                | 2.418(4)         | Gd3-O43                  | 2.263(4)         | Gd6-O32                   | 2.410(4)         |
| Gd1-O61                                | 2.442(4)         | Gd4-O4 <sup>i</sup>      | 2.376(4)         | Gd6-O33                   | 2.433(4)         |
| Gd2-O6                                 | 2.385(4)         | Gd4-O5 <sup>i</sup>      | 2.453(4)         | Gd6-O38                   | 2.439(4)         |
| Gd2-O8                                 | 2.392(4)         | Gd4-O18                  | 2.370(4)         | Gd6-O39                   | 2.484(4)         |
| Gd2-O9                                 | 2.416(4)         | Gd4-O20                  | 2.390(4)         | Gd6-O45                   | 2.355(4)         |
| Gd2-O22 <sup>i</sup>                   | 2.385(4)         | Gd4-O21                  | 2.480(5)         | Gd6-O50                   | 2.570(4)         |
| Gd2-O23 <sup>i</sup>                   | 2.421(4)         | Gd4-O46                  | 2.379(4)         | Gd6-O51                   | 2.389(4)         |
| Gd2-O34                                | 2.409(4)         | Gd4-O47                  | 2.395(4)         | Gd6-O58                   | 2.492(4)         |
| Gd2-O35                                | 2.405(5)         | Gd4-O49                  | 2.318(4)         | Gd6-O59                   | 2.401(4)         |
| Gd2-O37                                | 2.291(4)         | Gd5-O10 <sup>i</sup>     | 2.380(4)         |                           |                  |
| <b>Bond Angle</b>                      | <b>Angle (°)</b> | <b>Bond Angle</b>        | <b>Angle (°)</b> | <b>Bond Angle</b>         | <b>Angle (°)</b> |
| O2-Gd1-O30                             | 129.60(14)       | O37-Gd2-O34              | 76.71(15)        | O10 <sup>i</sup> -Gd5-O52 | 137.79(16)       |
| O3-Gd1-O2                              | 64.58(14)        | O37-Gd2-O35              | 143.55(15)       | O10 <sup>i</sup> -Gd5-O53 | 74.16(14)        |
| O3-Gd1-O30                             | 139.34(15)       | O12-Gd3-O14              | 145.98(16)       | O24-Gd5-O10 <sup>i</sup>  | 75.95(15)        |
| O16 <sup>i</sup> -Gd1-O2               | 117.28(15)       | O12-Gd3-O15              | 144.56(16)       | O24-Gd5-O11 <sup>i</sup>  | 81.29(15)        |
| O16 <sup>i</sup> -Gd1-O3               | 68.98(15)        | O12-Gd3-O28 <sup>i</sup> | 81.95(16)        | O24-Gd5-O26               | 145.00(16)       |
| O16 <sup>i</sup> -Gd1-O17 <sup>i</sup> | 65.96(14)        | O12-Gd3-O29 <sup>i</sup> | 74.72(15)        | O24-Gd5-O27               | 143.44(15)       |
| O16 <sup>i</sup> -Gd1-O30              | 71.55(15)        | O12-Gd3-O40              | 76.88(15)        | O24-Gd5-O52               | 79.13(14)        |
| O16 <sup>i</sup> -Gd1-O56              | 116.03(14)       | O12-Gd3-O42              | 78.19(17)        | O24-Gd5-O53               | 78.16(16)        |
| O16 <sup>i</sup> -Gd1-O57              | 144.26(15)       | O14-Gd3-O15              | 66.12(17)        | O26-Gd5-O11 <sup>i</sup>  | 133.56(15)       |
| O16 <sup>i</sup> -Gd1-O61              | 71.45(16)        | O14-Gd3-O28 <sup>i</sup> | 127.63(19)       | O26-Gd5-O27               | 66.06(15)        |

|                           |            |                                        |            |                          |            |
|---------------------------|------------|----------------------------------------|------------|--------------------------|------------|
| O17 <sup>i</sup> -Gd1-O2  | 132.37(15) | O14-Gd3-O29 <sup>i</sup>               | 129.50(17) | O26-Gd5-O53              | 74.76(16)  |
| O17 <sup>i</sup> -Gd1-O3  | 75.15(14)  | O14-Gd3-O40                            | 69.58(17)  | O27-Gd5-O11 <sup>i</sup> | 73.80(14)  |
| O17 <sup>i</sup> -Gd1-O30 | 97.46(14)  | O14-Gd3-O42                            | 92.6(2)    | O27-Gd5-O53              | 104.05(16) |
| O31-Gd1-O2                | 72.46(15)  | O15-Gd3-O28 <sup>i</sup>               | 80.23(17)  | O52-Gd5-O11 <sup>i</sup> | 140.88(14) |
| O31-Gd1-O3                | 78.23(15)  | O15-Gd3-O29 <sup>i</sup>               | 70.01(16)  | O52-Gd5-O26              | 70.34(15)  |
| O31-Gd1-O16 <sup>i</sup>  | 134.17(15) | O15-Gd3-O40                            | 134.58(16) | O52-Gd5-O27              | 136.16(14) |
| O31-Gd1-O17 <sup>i</sup>  | 75.47(14)  | O28 <sup>i</sup> -Gd3-O29 <sup>i</sup> | 64.93(14)  | O52-Gd5-O53              | 67.70(15)  |
| O31-Gd1-O30               | 139.59(15) | O28 <sup>i</sup> -Gd3-O40              | 137.88(15) | O53-Gd5-O11 <sup>i</sup> | 139.43(14) |
| O31-Gd1-O56               | 73.01(15)  | O29 <sup>i</sup> -Gd3-O40              | 139.31(15) | O55-Gd5-O10 <sup>i</sup> | 141.54(15) |
| O31-Gd1-O57               | 81.49(15)  | O42-Gd3-O15                            | 125.40(18) | O55-Gd5-O11 <sup>i</sup> | 75.92(15)  |
| O31-Gd1-O61               | 139.78(16) | O42-Gd3-O28 <sup>i</sup>               | 74.98(15)  | O55-Gd5-O24              | 109.11(15) |
| O56-Gd1-O2                | 126.63(14) | O42-Gd3-O29 <sup>i</sup>               | 133.92(15) | O55-Gd5-O26              | 81.90(16)  |
| O56-Gd1-O3                | 141.78(14) | O42-Gd3-O40                            | 65.32(15)  | O55-Gd5-O27              | 90.49(16)  |
| O56-Gd1-O17 <sup>i</sup>  | 73.68(14)  | O43-Gd3-O12                            | 87.72(18)  | O55-Gd5-O52              | 79.01(16)  |
| O56-Gd1-O30               | 66.90(14)  | O43-Gd3-O14                            | 79.0(2)    | O55-Gd5-O53              | 144.10(15) |
| O57-Gd1-O2                | 69.72(15)  | O43-Gd3-O15                            | 86.11(19)  | O32-Gd6-O33              | 67.18(14)  |
| O57-Gd1-O3                | 133.68(15) | O43-Gd3-O28 <sup>i</sup>               | 139.18(15) | O32-Gd6-O38              | 70.13(14)  |
| O57-Gd1-O17 <sup>i</sup>  | 137.83(15) | O43-Gd3-O29 <sup>i</sup>               | 74.25(14)  | O32-Gd6-O39              | 123.08(14) |
| O57-Gd1-O30               | 77.99(15)  | O43-Gd3-O40                            | 76.11(16)  | O32-Gd6-O50              | 75.56(14)  |
| O57-Gd1-O56               | 65.95(14)  | O43-Gd3-O42                            | 140.95(16) | O32-Gd6-O58              | 69.81(14)  |
| O57-Gd1-O61               | 81.03(17)  | O4 <sup>i</sup> -Gd4-O5 <sup>i</sup>   | 66.61(14)  | O33-Gd6-O38              | 76.17(14)  |
| O61-Gd1-O2                | 67.54(16)  | O4 <sup>i</sup> -Gd4-O20               | 120.28(17) | O33-Gd6-O39              | 69.52(14)  |
| O61-Gd1-O3                | 88.35(16)  | O4 <sup>i</sup> -Gd4-O21               | 72.18(16)  | O33-Gd6-O50              | 142.53(14) |
| O61-Gd1-O17 <sup>i</sup>  | 137.36(16) | O4 <sup>i</sup> -Gd4-O46               | 141.18(15) | O33-Gd6-O58              | 66.70(14)  |
| O61-Gd1-O30               | 70.07(16)  | O4 <sup>i</sup> -Gd4-O47               | 78.90(14)  | O38-Gd6-O39              | 65.02(14)  |
| O61-Gd1-O56               | 129.79(16) | O5 <sup>i</sup> -Gd4-O21               | 75.45(15)  | O38-Gd6-O50              | 87.93(14)  |
| O6-Gd2-O8                 | 149.60(13) | O18-Gd4-O4 <sup>i</sup>                | 78.98(15)  | O38-Gd6-O58              | 133.19(15) |
| O6-Gd2-O9                 | 144.05(15) | O18-Gd4-O5 <sup>i</sup>                | 75.80(15)  | O39-Gd6-O50              | 133.25(14) |
| O6-Gd2-O22 <sup>i</sup>   | 77.96(15)  | O18-Gd4-O20                            | 149.23(16) | O39-Gd6-O58              | 122.02(15) |
| O6-Gd2-O23 <sup>i</sup>   | 78.37(14)  | O18-Gd4-O21                            | 145.39(15) | O45-Gd6-O32              | 135.56(14) |

|                                        |            |                                        |            |             |            |
|----------------------------------------|------------|----------------------------------------|------------|-------------|------------|
| O6-Gd2-O34                             | 76.25(14)  | O18-Gd4-O46                            | 76.96(15)  | O45-Gd6-O33 | 139.79(14) |
| O6-Gd2-O35                             | 77.80(15)  | O18-Gd4-O47                            | 79.25(15)  | O45-Gd6-O38 | 82.83(14)  |
| O8-Gd2-O9                              | 65.38(14)  | O20-Gd4-O5 <sup>i</sup>                | 132.36(15) | O45-Gd6-O39 | 70.59(14)  |
| O8-Gd2-O23 <sup>i</sup>                | 129.04(14) | O20-Gd4-O21                            | 64.87(16)  | O45-Gd6-O50 | 68.67(14)  |
| O8-Gd2-O34                             | 74.14(14)  | O20-Gd4-O47                            | 81.41(16)  | O45-Gd6-O51 | 76.47(14)  |
| O8-Gd2-O35                             | 84.64(16)  | O46-Gd4-O5 <sup>i</sup>                | 133.77(15) | O45-Gd6-O58 | 143.86(14) |
| O9-Gd2-O23 <sup>i</sup>                | 74.53(15)  | O46-Gd4-O20                            | 73.53(16)  | O45-Gd6-O59 | 90.95(15)  |
| O22 <sup>i</sup> -Gd2-O8               | 121.61(15) | O46-Gd4-O21                            | 137.59(15) | O51-Gd6-O32 | 110.29(15) |
| O22 <sup>i</sup> -Gd2-O9               | 70.07(16)  | O46-Gd4-O47                            | 67.03(15)  | O51-Gd6-O33 | 133.51(14) |
| O22 <sup>i</sup> -Gd2-O23 <sup>i</sup> | 67.33(15)  | O47-Gd4-O5 <sup>i</sup>                | 140.45(14) | O51-Gd6-O38 | 149.30(14) |
| O22 <sup>i</sup> -Gd2-O34              | 138.64(15) | O47-Gd4-O21                            | 112.60(16) | O51-Gd6-O39 | 126.24(15) |
| O22 <sup>i</sup> -Gd2-O35              | 75.88(15)  | O49-Gd4-O4 <sup>i</sup>                | 137.75(15) | O51-Gd6-O50 | 63.58(14)  |
| O34-Gd2-O9                             | 139.49(15) | O49-Gd4-O5 <sup>i</sup>                | 71.15(14)  | O51-Gd6-O58 | 69.28(15)  |
| O34-Gd2-O23 <sup>i</sup>               | 135.89(14) | O49-Gd4-O18                            | 91.80(15)  | O51-Gd6-O59 | 68.11(16)  |
| O35-Gd2-O9                             | 108.82(17) | O49-Gd4-O20                            | 87.91(16)  | O58-Gd6-O50 | 104.44(14) |
| O35-Gd2-O23 <sup>i</sup>               | 139.43(15) | O49-Gd4-O21                            | 96.76(16)  | O59-Gd6-O32 | 133.03(15) |
| O35-Gd2-O34                            | 67.46(15)  | O49-Gd4-O46                            | 73.16(15)  | O59-Gd6-O33 | 80.99(16)  |
| O37-Gd2-O6                             | 100.49(15) | O49-Gd4-O47                            | 140.18(15) | O59-Gd6-O38 | 135.34(15) |
| O37-Gd2-O8                             | 79.30(16)  | O10 <sup>i</sup> -Gd5-O11 <sup>i</sup> | 67.07(14)  | O59-Gd6-O39 | 71.19(15)  |
| O37-Gd2-O9                             | 93.87(16)  | O10 <sup>i</sup> -Gd5-O26              | 116.43(16) | O59-Gd6-O50 | 130.58(16) |
| O37-Gd2-O22 <sup>i</sup>               | 140.03(15) | O10 <sup>i</sup> -Gd5-O27              | 69.91(15)  | O59-Gd6-O58 | 66.13(15)  |
| O37-Gd2-O23 <sup>i</sup>               | 73.20(15)  |                                        |            |             |            |

---

Symmetric code: (i) 1-x, 1-y, 1-z.

**Table S10.** Selected bond lengths and bond angles of Na<sub>4</sub>@Dy<sub>12</sub>@L<sub>20</sub>.

| <b>Bond</b>                            | <b>Length/Å</b>  | <b>Bond</b>              | <b>Length/Å</b>  | <b>Bond</b>                            | <b>Length/Å</b>  |
|----------------------------------------|------------------|--------------------------|------------------|----------------------------------------|------------------|
| Dy1-O2                                 | 2.502(3)         | Dy3-O12                  | 2.354(3)         | Dy5-O10 <sup>i</sup>                   | 2.372(3)         |
| Dy1-O3                                 | 2.466(3)         | Dy3-O14                  | 2.369(4)         | Dy5-O11 <sup>i</sup>                   | 2.448(3)         |
| Dy1-O16 <sup>i</sup>                   | 2.379(3)         | Dy3-O15                  | 2.397(4)         | Dy5-O26                                | 2.386(3)         |
| Dy1-O17 <sup>i</sup>                   | 2.457(3)         | Dy3-O28 <sup>i</sup>     | 2.417(4)         | Dy5-O27                                | 2.417(3)         |
| Dy1-O30                                | 2.518(3)         | Dy3-O29 <sup>i</sup>     | 2.445(3)         | Dy5-O52                                | 2.371(3)         |
| Dy1-O31                                | 2.338(3)         | Dy3-O40                  | 2.485(3)         | Dy5-O53                                | 2.409(3)         |
| Dy1-O56                                | 2.451(3)         | Dy3-O41                  | 2.382(4)         | Dy5-O55                                | 2.274(3)         |
| Dy1-O57                                | 2.395(3)         | Dy3-O43                  | 2.253(3)         | Dy6-O32                                | 2.398(3)         |
| Dy1-O61                                | 2.414(4)         | Dy4-O4 <sup>i</sup>      | 2.355(3)         | Dy6-O33                                | 2.424(3)         |
| Dy2-O6                                 | 2.370(3)         | Dy4-O5 <sup>i</sup>      | 2.434(3)         | Dy6-O38                                | 2.414(3)         |
| Dy2-O8                                 | 2.368(3)         | Dy4-O18                  | 2.360(3)         | Dy6-O39                                | 2.474(3)         |
| Dy2-O9                                 | 2.399(3)         | Dy4-O20                  | 2.365(4)         | Dy6-O45                                | 2.339(3)         |
| Dy2-O22 <sup>i</sup>                   | 2.371(3)         | Dy4-O21                  | 2.478(4)         | Dy6-O50                                | 2.567(3)         |
| Dy2-O23 <sup>i</sup>                   | 2.402(3)         | Dy4-O46                  | 2.368(3)         | Dy6-O51                                | 2.371(3)         |
| Dy2-O34                                | 2.387(3)         | Dy4-O47                  | 2.381(3)         | Dy6-O58                                | 2.476(3)         |
| Dy2-O35                                | 2.386(4)         | Dy4-O49                  | 2.308(3)         | Dy6-O59                                | 2.400(3)         |
| Dy2-O37                                | 2.275(3)         | Dy5-O24                  | 2.310(3)         |                                        |                  |
| <b>Bond Angle</b>                      | <b>Angle (°)</b> | <b>Bond Angle</b>        | <b>Angle (°)</b> | <b>Bond Angle</b>                      | <b>Angle (°)</b> |
| O2-Dy1-O30                             | 129.45(11)       | O37-Dy2-O34              | 76.51(12)        | O24-Dy5-O27                            | 143.38(11)       |
| O3-Dy1-O2                              | 64.69(11)        | O37-Dy2-O35              | 143.68(12)       | O24-Dy5-O52                            | 79.34(11)        |
| O3-Dy1-O30                             | 139.03(11)       | O12-Dy3-O14              | 146.65(13)       | O24-Dy5-O53                            | 78.78(12)        |
| O16 <sup>i</sup> -Dy1-O2               | 117.68(12)       | O12-Dy3-O15              | 144.73(12)       | O10 <sup>i</sup> -Dy5-O11 <sup>i</sup> | 67.38(11)        |
| O16 <sup>i</sup> -Dy1-O3               | 69.01(12)        | O12-Dy3-O28 <sup>i</sup> | 82.04(13)        | O10 <sup>i</sup> -Dy5-O26              | 116.35(12)       |
| O16 <sup>i</sup> -Dy1-O17 <sup>i</sup> | 66.03(11)        | O12-Dy3-O29 <sup>i</sup> | 74.46(12)        | O10 <sup>i</sup> -Dy5-O27              | 70.20(12)        |
| O16 <sup>i</sup> -Dy1-O30              | 71.32(11)        | O12-Dy3-O40              | 76.96(12)        | O10 <sup>i</sup> -Dy5-O53              | 73.84(11)        |
| O16 <sup>i</sup> -Dy1-O56              | 115.47(11)       | O12-Dy3-O41              | 79.00(13)        | O26-Dy5-O11 <sup>i</sup>               | 133.56(12)       |
| O16 <sup>i</sup> -Dy1-O57              | 144.35(12)       | O14-Dy3-O15              | 66.37(13)        | O26-Dy5-O27                            | 66.17(12)        |
| O16 <sup>i</sup> -Dy1-O61              | 71.13(13)        | O14-Dy3-O28 <sup>i</sup> | 125.60(16)       | O26-Dy5-O53                            | 74.59(13)        |

|                           |            |                                        |            |                          |            |
|---------------------------|------------|----------------------------------------|------------|--------------------------|------------|
| O17 <sup>i</sup> -Dy1-O2  | 132.07(11) | O14-Dy3-O29 <sup>i</sup>               | 130.89(14) | O27-Dy5-O11 <sup>i</sup> | 73.61(11)  |
| O17 <sup>i</sup> -Dy1-O3  | 75.03(11)  | O14-Dy3-O40                            | 69.84(13)  | O52-Dy5-O10 <sup>i</sup> | 137.54(12) |
| O17 <sup>i</sup> -Dy1-O30 | 97.93(10)  | O14-Dy3-O41                            | 90.08(16)  | O52-Dy5-O11 <sup>i</sup> | 140.85(11) |
| O31-Dy1-O2                | 72.60(12)  | O15-Dy3-O28 <sup>i</sup>               | 79.43(14)  | O52-Dy5-O26              | 70.30(12)  |
| O31-Dy1-O3                | 78.56(12)  | O15-Dy3-O29 <sup>i</sup>               | 70.59(12)  | O52-Dy5-O27              | 136.19(12) |
| O31-Dy1-O16 <sup>i</sup>  | 134.11(12) | O15-Dy3-O40                            | 134.84(12) | O52-Dy5-O53              | 67.82(11)  |
| O31-Dy1-O17 <sup>i</sup>  | 74.98(11)  | O28 <sup>i</sup> -Dy3-O29 <sup>i</sup> | 65.45(11)  | O53-Dy5-O11 <sup>i</sup> | 139.50(10) |
| O31-Dy1-O30               | 139.60(12) | O28 <sup>i</sup> -Dy3-O40              | 138.01(12) | O53-Dy5-O27              | 104.13(12) |
| O31-Dy1-O56               | 73.29(11)  | O29 <sup>i</sup> -Dy3-O40              | 138.77(11) | O55-Dy5-O24              | 108.79(12) |
| O31-Dy1-O57               | 81.46(12)  | O41-Dy3-O15                            | 123.69(14) | O55-Dy5-O10 <sup>i</sup> | 142.13(11) |
| O31-Dy1-O61               | 140.44(13) | O41-Dy3-O28 <sup>i</sup>               | 74.80(12)  | O55-Dy5-O11 <sup>i</sup> | 76.17(11)  |
| O56-Dy1-O2                | 126.76(11) | O41-Dy3-O29 <sup>i</sup>               | 134.44(12) | O55-Dy5-O26              | 81.75(13)  |
| O56-Dy1-O3                | 142.34(11) | O41-Dy3-O40                            | 65.79(12)  | O55-Dy5-O27              | 90.40(13)  |
| O56-Dy1-O17 <sup>i</sup>  | 73.87(11)  | O43-Dy3-O12                            | 89.45(14)  | O55-Dy5-O52              | 78.70(12)  |
| O56-Dy1-O30               | 66.62(11)  | O43-Dy3-O14                            | 79.88(17)  | O55-Dy5-O53              | 143.83(11) |
| O57-Dy1-O2                | 69.34(11)  | O43-Dy3-O15                            | 85.73(15)  | O32-Dy6-O33              | 67.37(11)  |
| O57-Dy1-O3                | 133.47(11) | O43-Dy3-O28 <sup>i</sup>               | 139.79(12) | O32-Dy6-O38              | 70.02(11)  |
| O57-Dy1-O17 <sup>i</sup>  | 137.96(11) | O43-Dy3-O29 <sup>i</sup>               | 74.39(12)  | O32-Dy6-O39              | 123.50(11) |
| O57-Dy1-O30               | 78.21(11)  | O43-Dy3-O40                            | 76.26(12)  | O32-Dy6-O50              | 75.44(11)  |
| O57-Dy1-O56               | 66.16(11)  | O43-Dy3-O41                            | 141.89(13) | O32-Dy6-O58              | 69.91(11)  |
| O57-Dy1-O61               | 81.34(13)  | O4 <sup>i</sup> -Dy4-O5 <sup>i</sup>   | 67.28(11)  | O32-Dy6-O59              | 133.31(12) |
| O61-Dy1-O2                | 68.03(12)  | O4 <sup>i</sup> -Dy4-O18               | 79.02(12)  | O33-Dy6-O39              | 69.38(11)  |
| O61-Dy1-O3                | 88.09(13)  | O4 <sup>i</sup> -Dy4-O20               | 120.16(13) | O33-Dy6-O50              | 142.56(10) |
| O61-Dy1-O17 <sup>i</sup>  | 137.11(12) | O4 <sup>i</sup> -Dy4-O21               | 73.19(13)  | O33-Dy6-O58              | 66.99(12)  |
| O61-Dy1-O30               | 69.64(12)  | O4 <sup>i</sup> -Dy4-O46               | 140.23(11) | O38-Dy6-O33              | 75.93(11)  |
| O61-Dy1-O56               | 129.42(13) | O4 <sup>i</sup> -Dy4-O47               | 77.83(11)  | O38-Dy6-O39              | 65.57(11)  |
| O6-Dy2-O9                 | 144.02(11) | O5 <sup>i</sup> -Dy4-O21               | 74.97(12)  | O38-Dy6-O50              | 87.73(11)  |
| O6-Dy2-O22 <sup>i</sup>   | 77.93(12)  | O18-Dy4-O5 <sup>i</sup>                | 75.38(11)  | O38-Dy6-O58              | 133.17(12) |
| O6-Dy2-O23 <sup>i</sup>   | 78.81(11)  | O18-Dy4-O20                            | 149.17(12) | O39-Dy6-O50              | 133.33(11) |
| O6-Dy2-O34                | 76.16(11)  | O18-Dy4-O21                            | 145.30(11) | O39-Dy6-O58              | 121.75(11) |

|                                        |            |                          |            |             |            |
|----------------------------------------|------------|--------------------------|------------|-------------|------------|
| O6-Dy2-O35                             | 77.08(12)  | O18-Dy4-O46              | 76.82(12)  | O45-Dy6-O32 | 135.42(11) |
| O8-Dy2-O6                              | 149.22(11) | O18-Dy4-O47              | 79.84(12)  | O45-Dy6-O33 | 139.49(11) |
| O8-Dy2-O9                              | 65.54(11)  | O20-Dy4-O5 <sup>i</sup>  | 132.70(12) | O45-Dy6-O38 | 82.81(11)  |
| O8-Dy2-O22 <sup>i</sup>                | 120.98(12) | O20-Dy4-O21              | 65.22(12)  | O45-Dy6-O39 | 70.50(11)  |
| O8-Dy2-O23 <sup>i</sup>                | 129.31(12) | O20-Dy4-O46              | 73.48(12)  | O45-Dy6-O50 | 68.64(11)  |
| O8-Dy2-O34                             | 74.15(11)  | O20-Dy4-O47              | 81.22(13)  | O45-Dy6-O51 | 76.57(12)  |
| O8-Dy2-O35                             | 84.36(12)  | O46-Dy4-O5 <sup>i</sup>  | 133.78(12) | O45-Dy6-O58 | 143.90(11) |
| O9-Dy2-O23 <sup>i</sup>                | 74.41(12)  | O46-Dy4-O21              | 137.68(12) | O45-Dy6-O59 | 90.80(12)  |
| O22 <sup>i</sup> -Dy2-O9               | 70.00(12)  | O46-Dy4-O47              | 67.17(11)  | O51-Dy6-O32 | 110.11(12) |
| O22 <sup>i</sup> -Dy2-O23 <sup>i</sup> | 67.91(11)  | O47-Dy4-O5 <sup>i</sup>  | 140.20(11) | O51-Dy6-O33 | 133.82(11) |
| O22 <sup>i</sup> -Dy2-O34              | 138.78(12) | O47-Dy4-O21              | 113.28(13) | O51-Dy6-O38 | 149.18(11) |
| O22 <sup>i</sup> -Dy2-O35              | 75.48(11)  | O49-Dy4-O4 <sup>i</sup>  | 138.40(11) | O51-Dy6-O39 | 125.98(12) |
| O34-Dy2-O9                             | 139.61(11) | O49-Dy4-O5 <sup>i</sup>  | 71.12(11)  | O51-Dy6-O50 | 63.57(11)  |
| O34-Dy2-O23 <sup>i</sup>               | 135.44(11) | O49-Dy4-O18              | 90.68(12)  | O51-Dy6-O58 | 69.26(12)  |
| O35-Dy2-O9                             | 109.10(14) | O49-Dy4-O20              | 88.51(13)  | O51-Dy6-O59 | 68.28(12)  |
| O35-Dy2-O23 <sup>i</sup>               | 139.47(11) | O49-Dy4-O21              | 96.42(12)  | O58-Dy6-O50 | 104.58(11) |
| O35-Dy2-O34                            | 67.85(12)  | O49-Dy4-O46              | 73.06(11)  | O59-Dy6-O33 | 81.18(13)  |
| O37-Dy2-O6                             | 101.50(12) | O49-Dy4-O47              | 140.23(11) | O59-Dy6-O38 | 135.33(12) |
| O37-Dy2-O8                             | 79.34(12)  | O24-Dy5-O10 <sup>i</sup> | 75.93(11)  | O59-Dy6-O39 | 70.61(12)  |
| O37-Dy2-O9                             | 93.31(13)  | O24-Dy5-O11 <sup>i</sup> | 80.95(11)  | O59-Dy6-O50 | 130.67(12) |
| O37-Dy2-O22 <sup>i</sup>               | 140.41(11) | O24-Dy5-O26              | 145.32(12) | O59-Dy6-O58 | 66.28(12)  |
| O37-Dy2-O23 <sup>i</sup>               | 73.13(11)  |                          |            |             |            |

---

Symmetric code: (i) 1-x, 1-y, 1-z.
